# Supplementary material
Source: HighWire-hosted journal article supplement (https://bmjopen.bmj.com/content/11/10/e049947)
Supplement: inline-supplementary-material-1 [file inline-supplementary-material-1.pdf]

## Data extraction instrument

### A. General Information

|                                                                                           |  |
|-------------------------------------------------------------------------------------------|--|
| 1. <b>Date form completed</b><br>(dd/mm/yyyy)                                             |  |
| 2. <b>Name/ID of person extracting data</b>                                               |  |
| 3. <b>Report title</b><br>(title of paper/ abstract/ report that data are extracted from) |  |
| 4. <b>Report ID</b><br>(if there are multiple reports of this study)                      |  |
| 5. <b>Reference details</b>                                                               |  |
| 6. <b>Report author contact details</b>                                                   |  |
| 7. <b>Publication type</b><br>(e.g. full report, abstract, letter)                        |  |
| 8. <b>Study funding source</b><br>(including role of funders)                             |  |
| 9. <b>Possible conflicts of interest</b><br>(for study authors)                           |  |
| 10. <b>Notes:</b>                                                                         |  |

### B. Eligibility

| <b>Study Characteristics</b>     | <b>Review Inclusion Criteria</b><br>(Consider inclusion criteria for each characteristic as defined in the Protocol) | <b>Yes/ No / Unclear</b> | <b>Location in text</b><br>(pg/fig/table) |
|----------------------------------|----------------------------------------------------------------------------------------------------------------------|--------------------------|-------------------------------------------|
| 11. <b>Type of study</b>         | Design (specify):                                                                                                    | ...                      |                                           |
| 12. <b>Participants</b>          |                                                                                                                      | ...                      |                                           |
| 13. <b>Types of intervention</b> |                                                                                                                      | ...                      |                                           |

| <b>Study Characteristics</b>         | <b>Review Inclusion Criteria</b><br><i>(Consider inclusion criteria for each characteristic as defined in the Protocol)</i> | <b>Yes/ No / Unclear</b> | <b>Location in text</b><br><i>(pg/fig/table)</i> |
|--------------------------------------|-----------------------------------------------------------------------------------------------------------------------------|--------------------------|--------------------------------------------------|
| 14. <b>Types of outcome measures</b> |                                                                                                                             | ...                      |                                                  |
| 15. <b>Decision:</b>                 | ...                                                                                                                         |                          |                                                  |
| 16. <b>Reason for exclusion</b>      |                                                                                                                             |                          |                                                  |
| 17. <b>Notes:</b>                    |                                                                                                                             |                          |                                                  |

**DO NOT PROCEED IF STUDY EXCLUDED FROM REVIEW**

## C. Population and setting

|                                                                                       | <b>Description</b><br><i>(Include comparative information for each group (i.e. intervention and controls) if applicable)</i> | <b>Location in text</b><br><i>(pg/fig/table)</i> |
|---------------------------------------------------------------------------------------|------------------------------------------------------------------------------------------------------------------------------|--------------------------------------------------|
| <b>18. Population description</b><br><i>(from which study participants are drawn)</i> |                                                                                                                              |                                                  |
| <b>19. Setting</b><br><i>(including location and social context)</i>                  |                                                                                                                              |                                                  |
| <b>20. Inclusion criteria</b>                                                         |                                                                                                                              |                                                  |
| <b>21. Exclusion criteria</b>                                                         |                                                                                                                              |                                                  |
| <b>22. Method(s) of recruitment of participants</b>                                   |                                                                                                                              |                                                  |
| <b>23. Notes:</b>                                                                     |                                                                                                                              |                                                  |

## D. Methods

|                                                                                        | <b>Descriptions as stated in report/paper</b> | <b>Location in text</b><br><i>(pg/fig/table)</i> |
|----------------------------------------------------------------------------------------|-----------------------------------------------|--------------------------------------------------|
| <b>24. Aim of study</b>                                                                |                                               |                                                  |
| <b>25. Design</b><br><i>(e.g. RCT, non-RCT, etc.)</i>                                  |                                               |                                                  |
| <b>26. Unit of allocation</b><br><i>(by individuals, cluster/groups or body parts)</i> |                                               |                                                  |
| <b>27. Start date</b>                                                                  |                                               |                                                  |
| <b>28. End date</b>                                                                    |                                               |                                                  |
| <b>29. Duration of participation</b><br><i>(from recruitment to last follow-up)</i>    |                                               |                                                  |

|                   |
|-------------------|
| 30. <b>Notes:</b> |
|-------------------|

*E. Risk of Bias assessment*

| Domain <sup>1</sup>            | Risk of bias<br><i>Low/ High/Unclear</i> | Support for judgement | Location in text<br><i>(pg/fig/table)</i> |
|--------------------------------|------------------------------------------|-----------------------|-------------------------------------------|
| 31.                            | ...                                      |                       |                                           |
| 32.                            | ...                                      |                       |                                           |
| 33.                            | ...                                      |                       |                                           |
| 34.                            | ...                                      |                       |                                           |
| <i>(extend rows as needed)</i> | ...                                      |                       |                                           |
| 35. <b>Notes:</b>              |                                          |                       |                                           |

*F. Participants*

|                                                                                             | Description as stated in report/paper | Location in text<br><i>(pg/fig/table)</i> |
|---------------------------------------------------------------------------------------------|---------------------------------------|-------------------------------------------|
| 36. <b>Total pop. at start of study</b>                                                     |                                       |                                           |
| 37. <b>Withdrawals and exclusions</b>                                                       |                                       |                                           |
| 38. <b>Total participants included in the study</b>                                         |                                       |                                           |
| <i>(For the following sections, from 39 to 43, consider only the participants included)</i> |                                       |                                           |
| 39. <b>Age</b>                                                                              |                                       |                                           |

<sup>1</sup> For randomised studies, see Chapter 23.1.2 of the Cochrane Handbook:  
[https://training.cochrane.org/handbook/current/chapter-23#\\_Ref529610397](https://training.cochrane.org/handbook/current/chapter-23#_Ref529610397)

For non-randomised studies, see Chapter 24.5 of the Cochrane Handbook:  
<https://training.cochrane.org/handbook/current/chapter-24#section-24-5>

|                                                                                                           | Description as stated in report/paper | Location in text<br>(pg/fig/table) |
|-----------------------------------------------------------------------------------------------------------|---------------------------------------|------------------------------------|
| 40. Sex                                                                                                   |                                       |                                    |
| 41. Race/Ethnicity                                                                                        |                                       |                                    |
| 42. Other relevant sociodemographics                                                                      |                                       |                                    |
| 43. Other relevant characteristics in relation to the study/intervention<br>(e.g. knowledge of a disease) |                                       |                                    |
| 44. Notes:                                                                                                |                                       |                                    |

### G. Procedure

In case of multiple groups, copy and paste the table for each intervention and comparison group, and title tables as “intervention group 1”, “intervention group 2”, etc.

|                                                                                                                                                            | Description as stated in report/paper | Location in text<br>(pg/fig/table) |
|------------------------------------------------------------------------------------------------------------------------------------------------------------|---------------------------------------|------------------------------------|
| 45. Group name (if applicable)                                                                                                                             |                                       |                                    |
| 46. No. randomised to group (if applicable)                                                                                                                |                                       |                                    |
| 47. Description<br>(include sufficient detail for replication, e.g. content, components, measures, delivery; if applicable, describe the pre-intervention) |                                       |                                    |
| 48. Duration                                                                                                                                               |                                       |                                    |
| 49. Timing (if applicable)<br>(e.g. duration of each stage)                                                                                                |                                       |                                    |
| 50. Providers<br>(e.g. no., profession, training, ethnicity etc. if relevant)                                                                              |                                       |                                    |

|                                                                                                                    | Description as stated in report/paper | Location in text<br>(pg/fig/table) |
|--------------------------------------------------------------------------------------------------------------------|---------------------------------------|------------------------------------|
| 51. <b>Co-interventions (if applicable)</b>                                                                        |                                       |                                    |
| 52. <b>Economic variables</b><br><i>(i.e. intervention cost, changes in other costs as result of intervention)</i> |                                       |                                    |
| 53. <b>Resource requirements to replicate intervention</b><br><i>(e.g. staff numbers, equipment...)</i>            |                                       |                                    |
| 54. <b>Notes:</b>                                                                                                  |                                       |                                    |

## H. Results

If applicable, duplicate the table to present results details for each outcome

|                                                                                                                                                                                                                                    | Description as stated in report/paper | Location in text<br>(pg/fig/table) |
|------------------------------------------------------------------------------------------------------------------------------------------------------------------------------------------------------------------------------------|---------------------------------------|------------------------------------|
| 55. Outcome                                                                                                                                                                                                                        |                                       |                                    |
| 56. Subgroup (if applicable)                                                                                                                                                                                                       |                                       |                                    |
| 57. Time point<br>(specify whether from start or end of intervention)                                                                                                                                                              |                                       |                                    |
| 58. Results<br>(Note changes from baseline data and provide any statistical relevant details (e.g., means, standard deviations, confidence intervals, exact p-values); at least, refer to the appropriate in-text table or figure) |                                       |                                    |
| 59. Mediating variables                                                                                                                                                                                                            |                                       |                                    |
| 60. Moderating variables (and intermediate results)                                                                                                                                                                                |                                       |                                    |

|                                                                                                                                                                   | Description as stated in report/paper | Location in text<br>(pg/fig/table) |
|-------------------------------------------------------------------------------------------------------------------------------------------------------------------|---------------------------------------|------------------------------------|
| 61. <b>No. missing participants and reasons</b>                                                                                                                   |                                       |                                    |
| 62. <b>Unit of analysis</b><br>(e.g. by individuals, health professional, practice, hospital, community; was the unit of analysis independent from the provider?) |                                       |                                    |
| 63. <b>Statistical methods used and appropriateness of these methods</b><br>(e.g. adjustment for correlation)                                                     |                                       |                                    |
| 64. <b>Notes:</b>                                                                                                                                                 |                                       |                                    |

### I. Applicability

|                                                                                                                                                                  | Yes/No/Unclear | Notes: |
|------------------------------------------------------------------------------------------------------------------------------------------------------------------|----------------|--------|
| 65. <b>Have important populations been excluded from the study?</b><br>(consider disadvantaged populations, and possible differences in the intervention effect) | ...            |        |
| 66. <b>Is the intervention likely to be aimed at disadvantaged groups?</b><br>(e.g. lower socioeconomic groups)                                                  | ...            |        |
| 67. <b>Does the study directly address the review question?</b><br>(any issues of partial or indirect applicability)                                             | ...            |        |
| 68. <b>Notes:</b>                                                                                                                                                |                |        |



*J. Other information*

|                                                                                     | Description as stated in report/paper | Location in text<br>(pg/fig/table) |
|-------------------------------------------------------------------------------------|---------------------------------------|------------------------------------|
| 69. <b>Key conclusions of study authors</b>                                         |                                       |                                    |
| 70. <b>References to other relevant studies</b>                                     |                                       |                                    |
| 71. <b>Further study information requested</b><br><i>(from whom, what and when)</i> |                                       |                                    |
| 72. <b>Correspondence received</b><br><i>(from whom, what and when)</i>             |                                       |                                    |
| 73. <b>Notes:</b>                                                                   |                                       |                                    |
